# Supplementary material for: Mitochondrial ribosomal protein PTCD3 mutations cause oxidative phosphorylation defects with Leigh syndrome
Source: Springer Nature journal article supplement (doi:10.1007/s10048-018-0561-9), 2019-01-03
Supplement: MOESM3 [file 16373124]

## Sheet: Table-S2b
Supplementary Table S2b: Mean level of proteins from each OXPHOS complexes and mitoribosomal complexes incomparison to C1 (HGNC classification)
List	Number of proteins quantified	One-sided p-value	Mean log2 (expression)
Complex I	41	3.296e-15	-1.481
Complex II	4	0.972	0.006
ComplexIII	9	0.0009881	-0.372
Complex IV	11	4.437e-07	-2.417
Complex V	2	0.129	-0.353
Large mitoribosome	48	0.194	0.043
Small mitoribosome	30	1.52e-06	-1.097
